# Supplementary material for: Bivalves maintain repair when faced with chronically repeated mechanical stress
Source: Oxford University Press journal article supplement (doi:10.1242/jeb.243813), 2022-05-15
Supplement: jeb243813supp.pdf [file jeb243813supp.pdf]

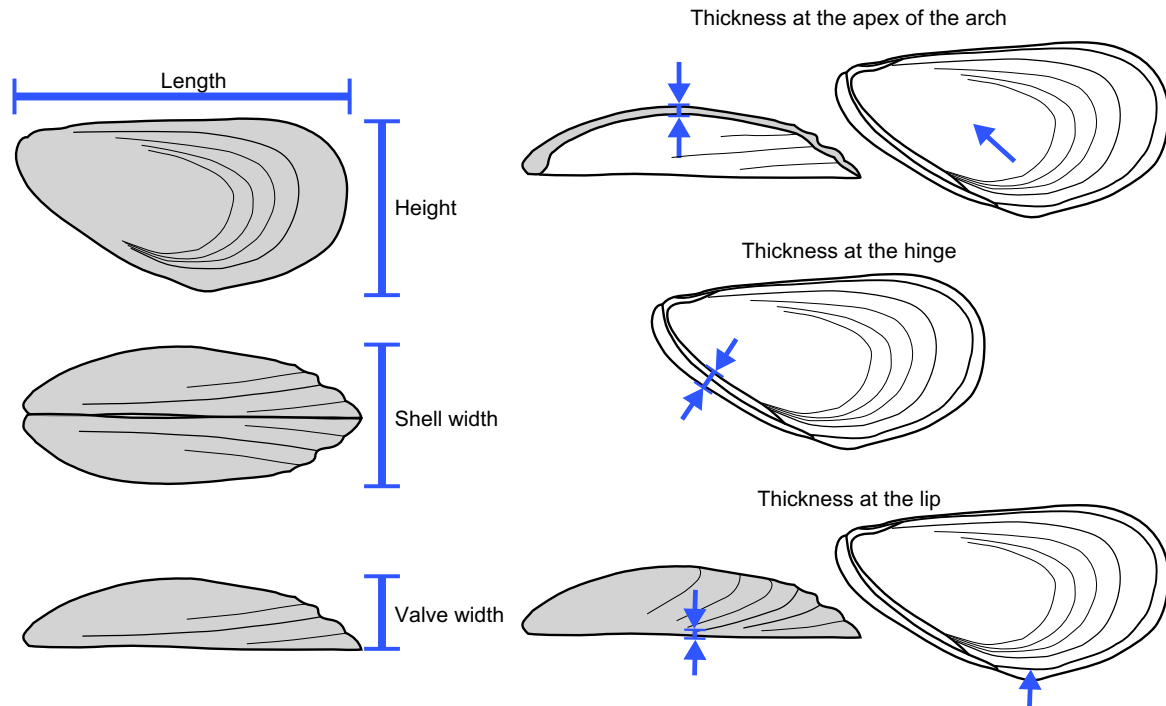

**Fig. S1. A suite of morphological measurements were collected from whole mussel shells as well as individual valves.** Length was defined as the maximum distance along the anterior-posterior axis, height along the perpendicular dorsal-ventral axis, and width perpendicular to the aperture. We also measured thickness at three locations: the apex of the dome (i.e., the point on the valve farthest from the aperture, and where width was measured), the midpoint of the hinge parallel to the aperture, and the dorsal lip just posterior of the hinge. External views are shaded in gray, and internal views are not shaded. Thickness at the apex of the hinge is shown in cross-section.
